# Supplementary material
Source: PubMed Central journal article supplement (PMC6369285)
Supplement: supp_RA118.005876_140803_1_supp_244755_pjbk8y.pdf [file supp_RA118.005876_140803_1_supp_244755_pjbk8y.pdf]

## Supplemental Information

### Supplemental Experimental Procedures

#### *Reagents Lipid Administration and Flow Cytometry (Yeast cells) – continued.*

Analytical flow cytometry was performed using a three-laser BD LSRII (BD Biosciences) operating on the FACS Diva 6.1.3 software package. Forward and side-scatter were used to identify single cell populations as illustrated in (fig S12): note, different settings were required to isolate *S.cerevisiae* and *S.pombe* single cells. Experiments were gated with both cell controls and single cell populations selected during data analysis. PI was used to exclude dead cells from analysis, and NBD-lipid uptake was measured using a FITC filter set (530/30 nm band-pass filter with 525 nm long-pass filter). At least 10,000 cells were analyzed per experimental replicate.

Inhibitor experiments were performed essentially as outlined above, except the NBD-lipid media was not pre-chilled prior to cellular administration to ensure solubility of the inhibitors during cell application. Lipid inhibitors were solubilized in 100% ethanol and added to SD supplemented with NBD-lipid probes at the indicated final concentrations. The final concentration of ethanol in all assay mixtures was 2.2%. The lysoSM and GlcSph inhibitors were selected because their critical micelle concentrations were determined to be compatible with the lipid uptake assay.

#### *NBD-GlcCer colocalization microscopy.*

Cells were cultured and administered NBD-lipids as outlined above. Once NBD-lipid incubation was completed, the cells were washed three times in 4% BSA-SA and twice with SA. The final cell pellets were resuspended in 10  $\mu$ l of SA and maintained on ice for imaging before being mounted on glass slides and being imaged at room temperature. Images were acquired using a DeltaVision Elite system (GE Healthcare) using an Olympus 100x/1.4 NA UPLS Apo objective using FITC and A594 dichroic filters and deconvolved using SoftWoRx software (GE Healthcare). Post-acquisition analyses and presentation were prepared using Image J (NIH) in accordance to published ethical guidelines (1).

#### *Surface biotinylation.*

Cell surface biotinylation assays were performed as described previously (2). Cells were washed three times with chilled PBS containing 0.1 mM CaCl<sub>2</sub> and 0.1 mM MgCl<sub>2</sub> (PBS<sup>++</sup>) and incubated with 2 mM sulfo-NHS-LC-biotin (Thermo Scientific) in PBS<sup>++</sup> at 4°C for 30 min - 2 h. To stop the biotinylation, the cells were washed three times with chilled PBS<sup>++</sup> containing 100 mM glycine and 0.3% BSA, and then washed twice more with chilled PBS. The cells were then lysed in lysis buffer (20 mM HEPES-KOH [pH 7.4] containing 1% NP-40, 150 mM NaCl, and protease inhibitor cocktail [Nacalai Tesque]) for 30 min at 4°C. The lysates were centrifuged at maximum speed at 4°C for 20 min in a microcentrifuge to remove cellular debris and insoluble materials. Protein concentration of lysates were determined by BCA protein assay (Nacalai Tesque) and 400  $\mu$ g of proteins were used. To precipitate the biotinylated proteins, the supernatant was incubated at 4°C for 2 h with streptavidin-agarose beads (Thermo Scientific) pre-equilibrated with lysis buffer. The streptavidin beads were washed three times with lysis buffer, once with high-salt buffer (20 mM HEPES-KOH [pH 7.4], 500 mM NaCl, 1 mM EDTA, 0.5% NP-40), and once with 20 mM HEPES-KOH, pH 7.4. Proteins were eluted from the beads with SDS-PAGE sample buffer, denatured at 25°C for 16 h, and subjected to immunoblot analysis.

#### *Sequence Alignments and Phylogeny Analysis.*

Protein sequences were collected from National Center for Biotechnology Information (NCBI) or UniProt, alignments performed using the ClustalW method ([www.genome.jp/tools/clustalw/](http://www.genome.jp/tools/clustalw/)), and phylogenetic analyses were performed using the tools provided on the same website. NCBI or Uniprot reference sequence accession numbers for each member of the alignment and phylogeny tree are as follows: Sp Dnf1 (Q9UT43.2), Sp Dnf2 (Q09891.1), Sp Dnf2.5 (NP\_594759.1), Sp Drs2 (NP\_596486.1), Sp Neo1 (Q10309.1); Sc Dnf1 (NP\_011093.3), Sc Dnf2 (NP\_010378.1), Sc Dnf3 (NP\_013885.1), Sc

Drs2 (NP\_009376.2), Sc Neo1 (P40527); Hs ATP8A1 (Q9Y2Q0), Hs ATP8A2 (Q9NTI2.2), Hs ATP8B1 (O43520), Hs ATP8B2 (P98198), Hs ATP8B3 (Q6UQ17), Hs ATP8B4 (NP\_079113.2), Hs ATP9A (O75110), Hs ATP9B (O43861), Hs ATP10A (NP\_077816.1), Hs ATP10B (NP\_079429.2), Hs ATP10D (Q9P241), Hs ATP11A (P98196.3), Hs ATP11B (NP\_055431.1), Hs ATP11C (Q8NB49). Logo alignments were generated with <http://weblogo.berkeley.edu/logo.cgi> (3) using a master alignment of P4-ATPases.

#### *Lipid Extraction and thin layer chromatography.*

NBD-PLs were administered as outlined above for yeast flow cytometry applications and washed twice with 4% BSA-SD, then resuspended in SD and placed on ice, as indicated. Following the washes, chase timepoints were taken by extracting lipids using a modified Bligh and Dyer method. Following resuspension in SD, 0.5 ml cell suspension cultures were mixed with 2 ml of methanol:chloroform (2:1) at the indicated timepoints. The mixtures were shaken at 30°C for 10 min to facilitate extraction, vortexed vigorously, and centrifuged for 5 min at 1,000 rpm to pellet cellular debris. The supernatant was removed and mixed with 0.5 ml chloroform and 1.5 ml 0.9% NaCl (wt/vol). After vortexing to mix, the mixture was centrifuged for 5 min at 1,000 rpm and the aqueous phase removed. The organic phase was evaporated in a Savant speed vac centrifuge, resuspended in 10  $\mu$ l of methanol:chloroform (2:1). 5  $\mu$ l of each sample and ~0.025  $\mu$ g of the designated standard were spotted onto the TLC plates. Separations were performed using a chloroform:methanol:ammonium hydroxide mobile phase (65:25:4), dried, and visualized using a BioRad Gel Doc EZ Imager running software Image Lab version 5.2.1. Plates were digitally imaged below saturation using the manufacturer's SYBR Green. TLC digital images were exported as .tif files and spot quantification was performed using densitometry analysis using ImageJ (National Institutes of Health). Background density was taken from an area of the plate without sample, and subtracted from each spot reading. Trios of plates performed in parallel were imaged under the same settings, and the data were normalized to 0 min timepoint of the vector control NBD-GlcCer spot to compare between experiments and exposures. Total lane signal was taken by measuring density from each lane, starting from the spot up to the solvent front (indicated in Fig. S3B). Signal intensity from the 0min timepoint for each experiment was set at 1.0, and all other measurements were normalized to this value and assessed. All data analyses and statistical assessments were performed using a combination of GraphPad Prism 6 and Microsoft Excel.

*Data availability.* The primary data will be available upon request. Homology models will be available for download from the Graham lab (<https://my.vanderbilt.edu/grahamlab/>) and Shin lab (<http://www.pharm.kyoto-u.ac.jp/hshin/ShinIndex.html>) websites. The substrate transport measurements for all *S. cerevisiae* Dnf1 and Dnf2 enzyme variants are included in supplementary Tables 3 and 4, and the *S. cerevisiae* Dnf1 homology model was published previously and is available for download on a publicly accessible server. No material transfer agreements are required for data accessibility.

#### *Data Analysis*

All statistical analyses were performed using GraphPad Prism 6. A one-way ANOVA was run to assess variance in all data sets, and Tukey's post hoc analysis used for comparisons. Linear regression fits were used to assess rates of substrate uptake in Figure S7.

## Supplemental Data

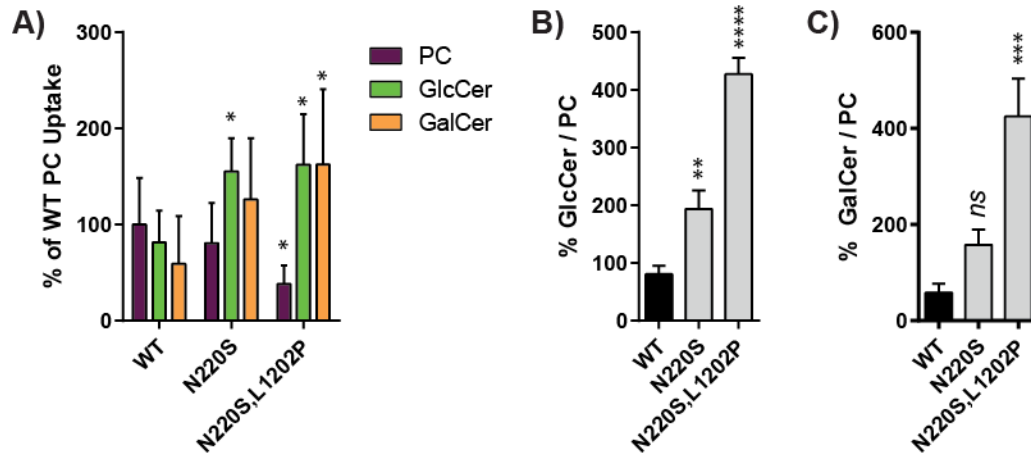

**Figure S1. Sphingosine backbone gain-of-function mutations in *Dnf1* enhance existing selection and preference for NBD-glycosphingolipids.** pRS313-DNF1<sup>+</sup> was expressed in a *dnf1, 2Δ* background and its transport of NBD-PC, NBD-GlcCer, and NBD-GalCer was normalized to vector controls. (A) *Dnf1* WT was compared to two *Dnf1* mutant variants that were previously established to discriminate the sphingosine backbone. Ratiometric analyses of NBD-glycosphingolipid transport relative to NBD-PC revealed that the gain-of-function substitutions enhanced the preference for NBD-GlcCer (B) and NBD-GalCer (C).  $n \geq 6 \pm SD$ . A one-way ANOVA was performed to assess variance and comparisons to WT were made with Tukey's post hoc analysis. \* indicates  $p < 0.05$ , \*\*  $p < 0.01$ , \*\*\*  $p < 0.001$ , and \*\*\*\*  $p < 0.0001$ .

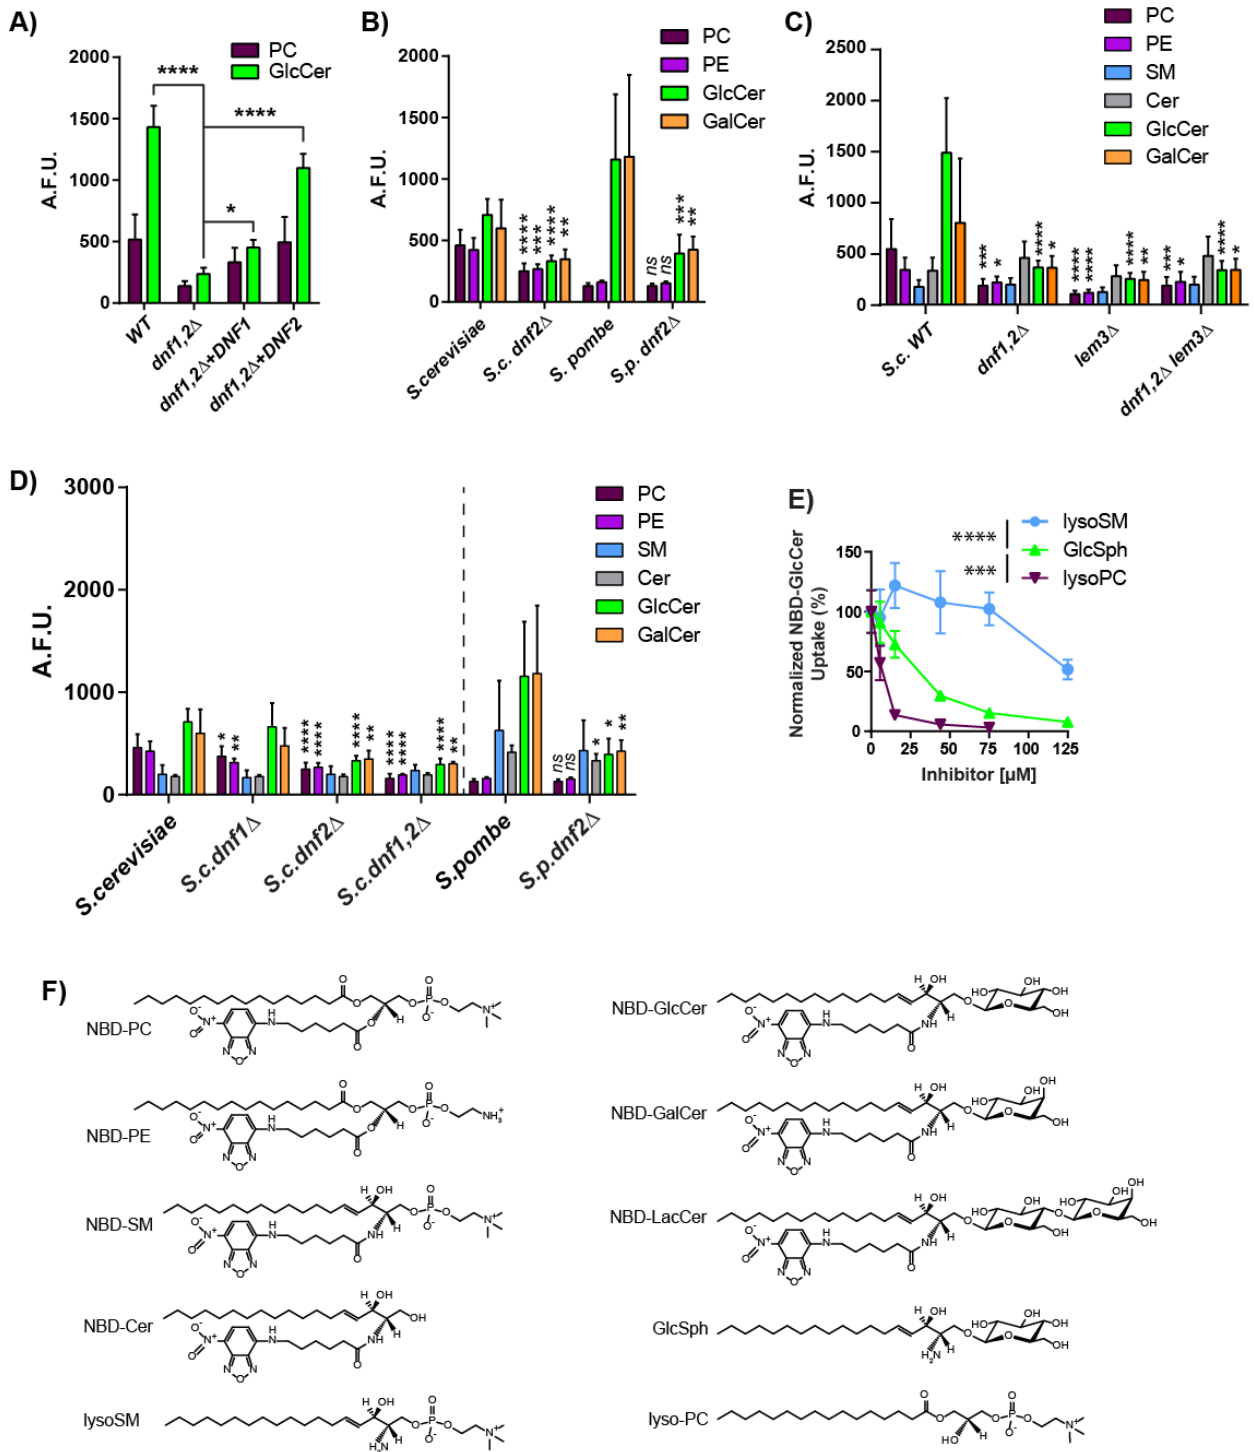

**Figure S2. P4-ATPase KO in *S. cerevisiae* and *S. pombe* reveal conserved glycosphingolipid transport.** (A) Plasmid-borne expression of DNF1 and DNF2 complements cellular uptake of NBD-PC and NBD-GlcCer in *dnf1,2Δ* background,  $n=6 \pm SD$ , (arbitrary fluorescent units: A.F.U.). (B) Raw NBD-lipid uptake analyses of *S. cerevisiae* and *S. pombe* WT and *dnf2Δ* strains,  $n \geq 9 \pm SD$ . *S. cerevisiae dnf1Δ* and *dnf2Δ* strains exhibit decreases in both PC and PE glycerophospholipids as well as GlcCer and GalCer glycosphingolipids (*dnf2Δ*). (C) Mutations in the *dnf1,2* beta subunit, *lem3*, reduce NBD-PC, NBD-PE, NBD-GlcCer, and NBD-GalCer transport,  $n=6 \pm SD$ . (D) Conversely, *S. pombe dnf2Δ* did not

alter glycerophospholipid transport, yet significantly decreases glycosphingolipid transport,  $n \geq 9 \pm \text{SD}$ . (E) NBD-GlcCer uptake was tested in *S.c. dnf1,2Δ* cells expressing empty vector or DNF2, and transport was inhibited with increasing concentrations of lysoPC and GlcSph, but not lysoSM,  $n \geq 6 \pm \text{SD}$ . (F) The chemical structures of all lipids analyzed in this study are presented. Avanti catalog numbers: NBD-PC (#810130), NBD-PE (#810153), NBD-SM (#810218), NBD-Cer (#810209), NBD-GlcCer (#810222), NBD-GalCer (#810220), NBD-LacCer (#810226), lysoSM (#860600), GlcSph (#860535), lysoPC (#855675). A one-way ANOVA was performed to assess variance and comparisons to WT were made with Tukey's post hoc analysis (B,C,D). Pairwise comparisons between WT and KO *S. cerevisiae* and *S. pombe* strains were made with an unpaired Student's t test (B). Inhibition data sets in (E) were assessed using a Two-way ANOVA with a Tukey's comparison. \* indicates  $p < 0.05$ , \*\*  $p < 0.01$ , \*\*\*  $p < 0.001$ , and \*\*\*\*  $p < 0.0001$ . ns highlights no significance.

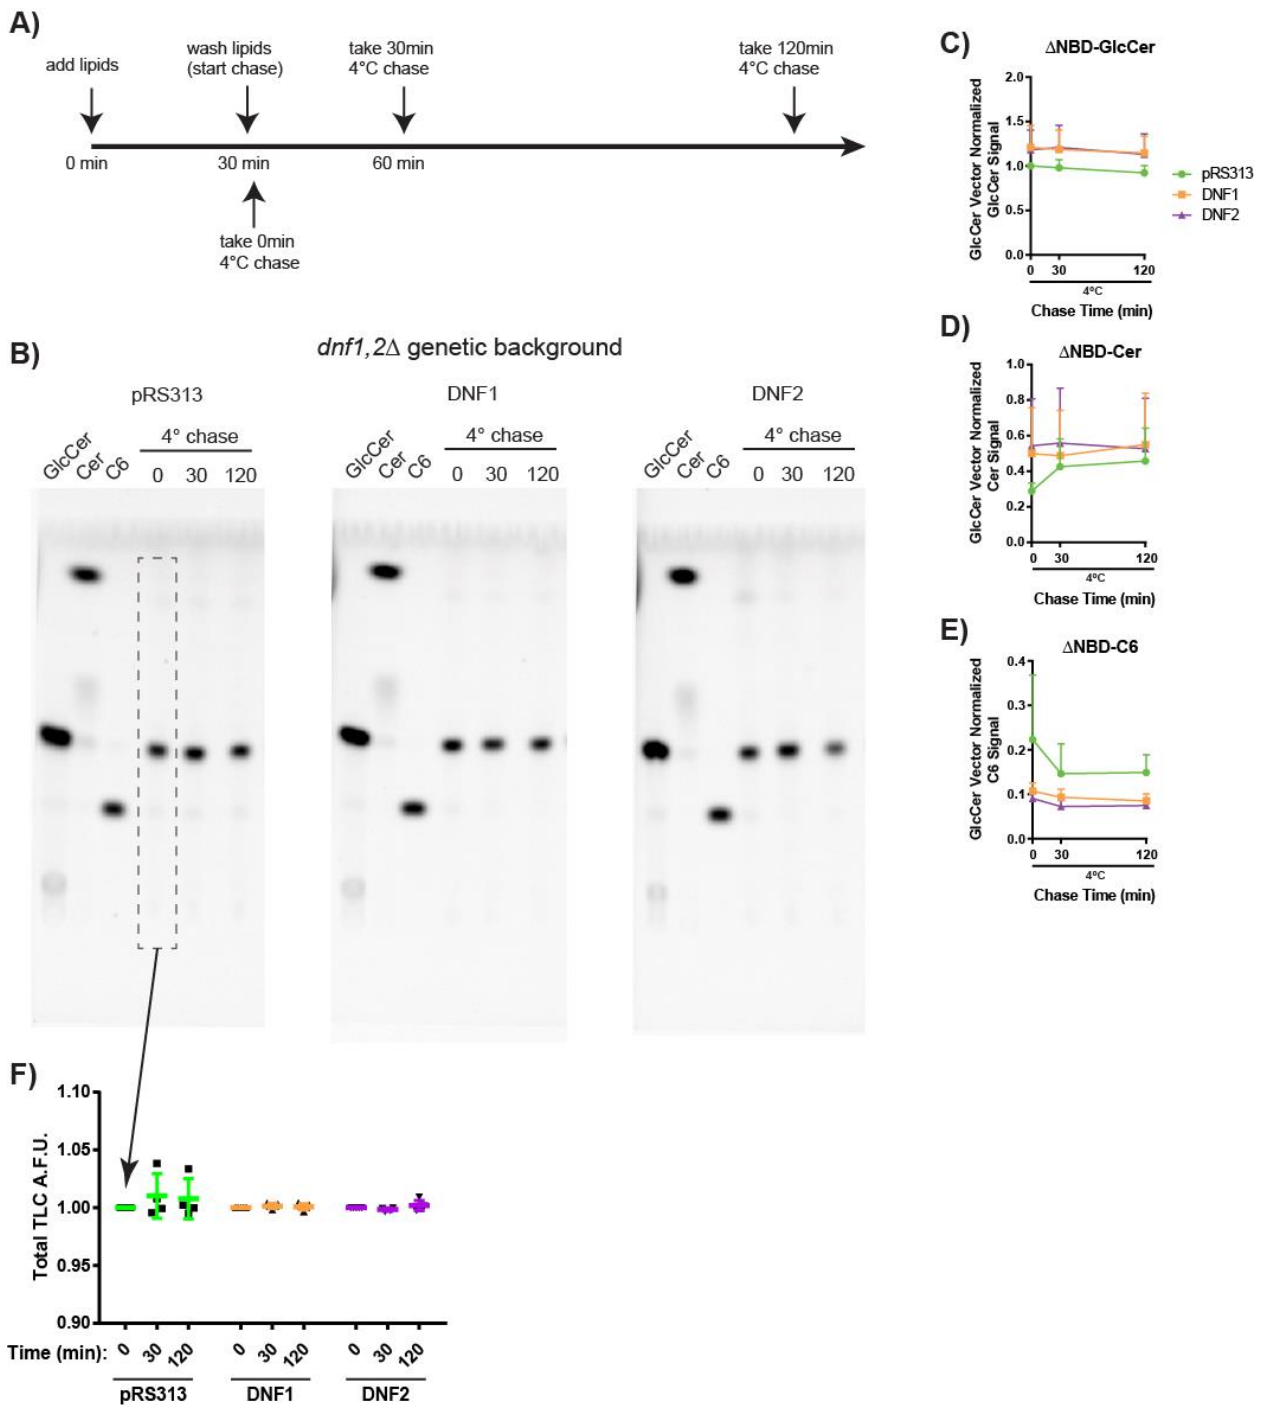

**Figure S3. NBD-GlcCer is not appreciably metabolized over 120 min following administration.**

*dnf1,2Δ* cells expressing pRS313 vector, pRS313-DNF1, or pRS313-DNF2 were pulsed with NBD-GlcCer for 30 min on ice, washed, and incubated on ice. (A) Cells on ice were harvested at 0 min, 30 min, and 120 min for lipid extraction. (B) Extracts were separated by thin layer chromatography (TLC) and visualized, revealing very little metabolism of the NBD-GlcCer substrate, with quantification of NBD-GlcCer (C), NBD-Cer (D), and NBD-hexanoic acid (E),  $n \geq 4$ ,  $\pm$  SEM. Variability was increased in the NBD-Cer analyses due to close migration near the solvent front, thereby inconsistently elevating the

background. A repeated measures 2-way ANOVA was used to assess variance between genotypes, and comparisons were made with Tukey's post hoc test. No significant differences in NBD-lipid metabolism were found between the genotypes ( $p>0.05$ ). Representative images were selected to most clearly illustrate the consistent lack of NBD-GlcCer metabolism. **(F)** Total fluorescent signal was assessed in each lane to examine the all NBD-lipid extracts per sample. Signal was collected from spot to ceramide front, as indicated by the dashed box in **(B)**. Signal in the 0min lane was set at 1.0, and 30min and 120min lanes were normalized to this value and compared. Total fluorescent signal did not significantly change between samples, as tested by a one-way ANOVA with Tukey's comparison,  $n\geq 4$ . These data suggest that equivalent amounts of NBD-lipid were extracted when sampling within each genotype.



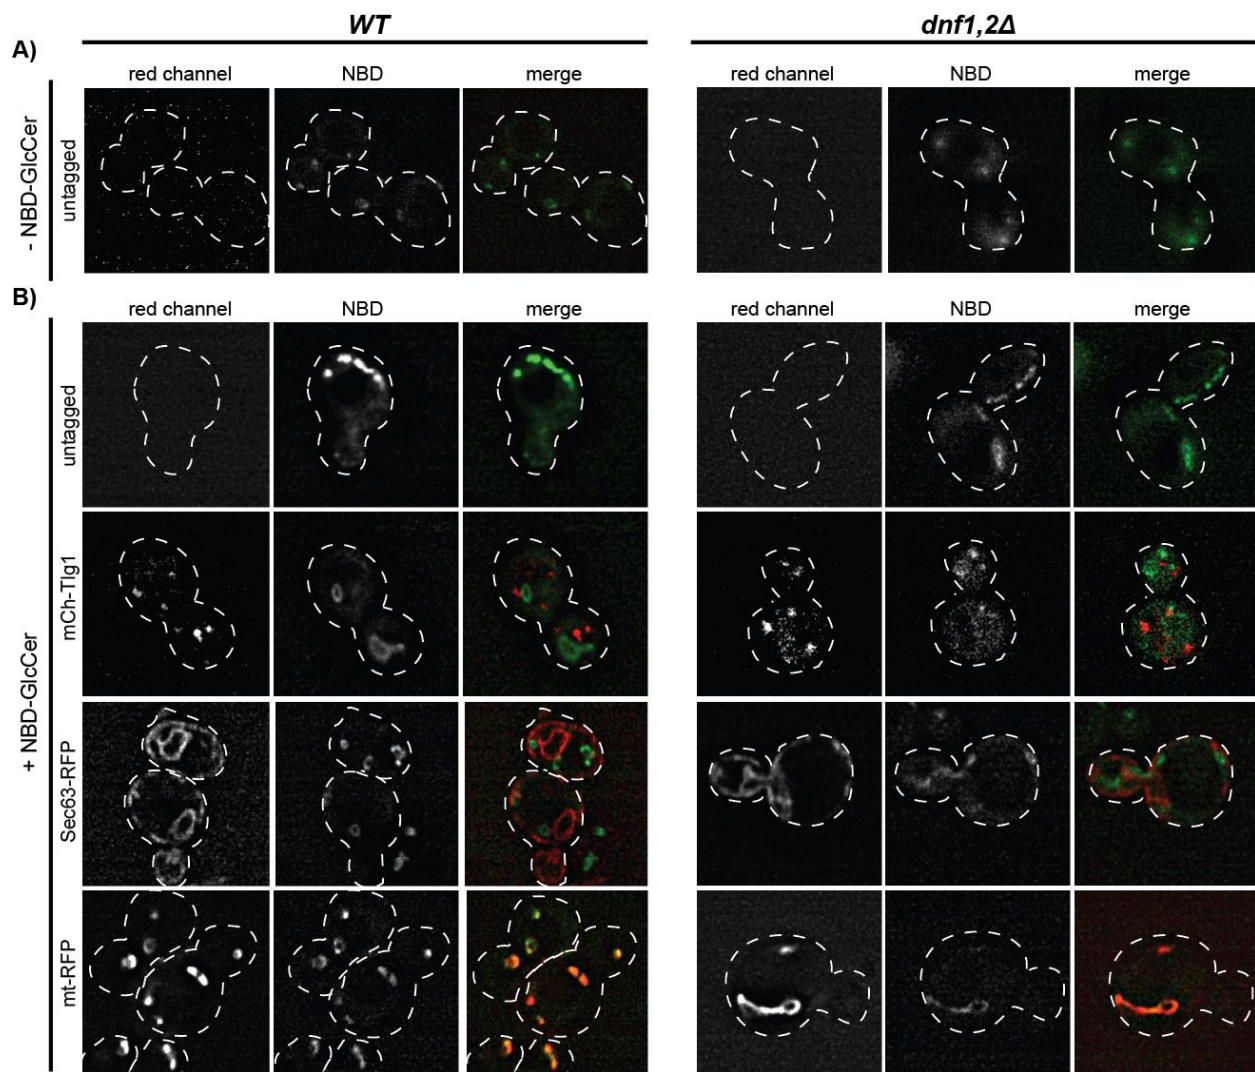

**Figure S4. NBD-GlcCer localizes to the mitochondria.** The NBD fluorophore photobleaches rapidly during microscopy, therefore images have been scaled to present localization rather than intensity. (A) *WT* (BY4171) and *dnf1,2Δ* cells were imaged without markers and lipids to define channel autofluorescence. (B) NBD-GlcCer was added as detailed in the Materials and Methods, to each strain featuring red fluorescent markers for endosomes (mCh-Tlg1), ER (Sec63-RFP), and mitochondria (mt-RFP). Images are representative of 3 experiments.



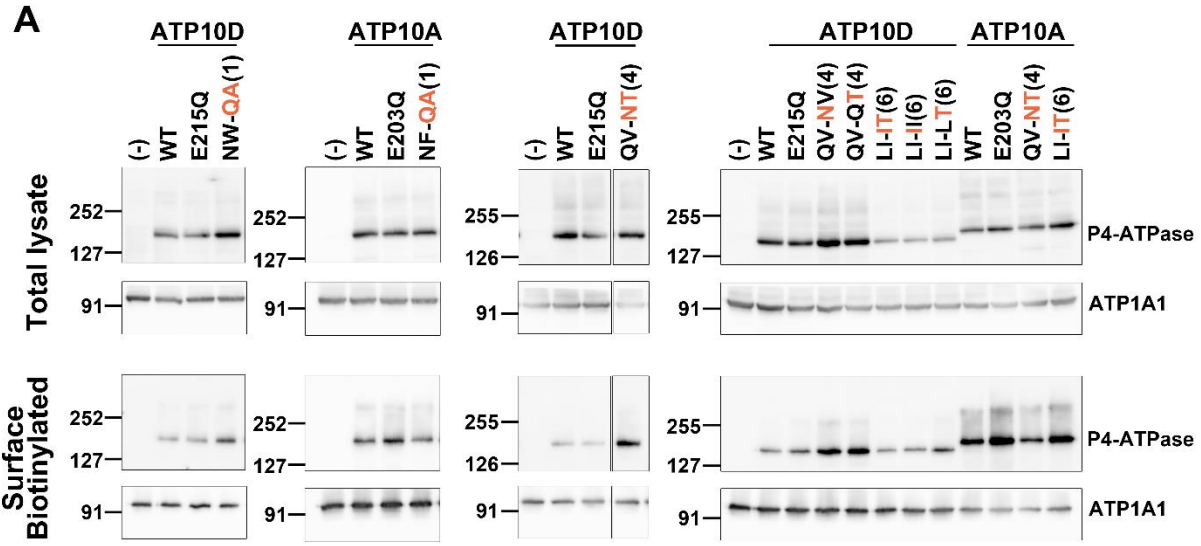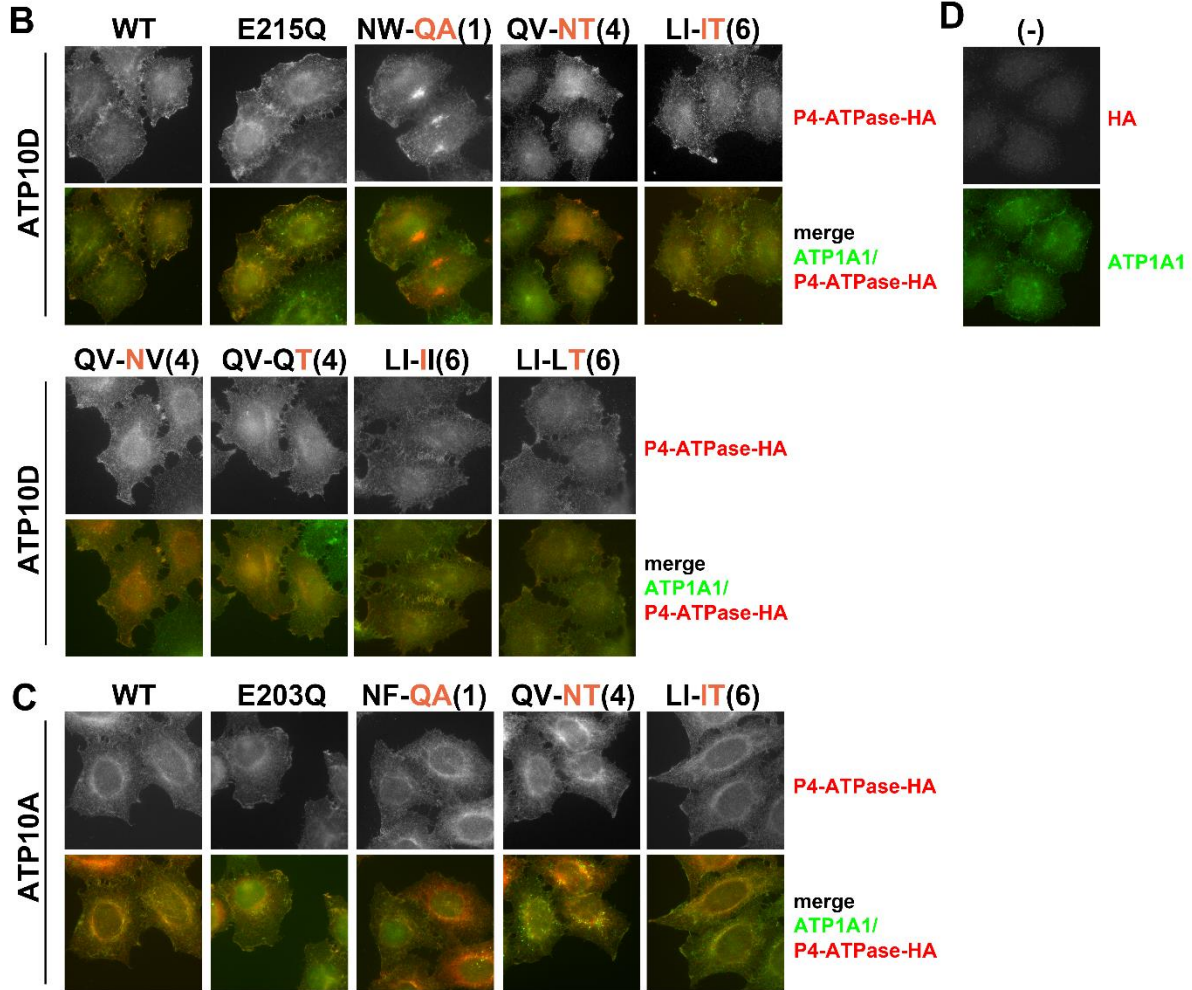

**Figure S5. ATP10A and ATP10D constructs localized to the PM in HeLa cells.** HeLa cells stably expressing C-terminally HA-tagged ATP10A, ATP10D, and each mutant (indicated) were analyzed. The NBD-lipid transport profiles of each of these constructs were tested in Figs. 2 and 6, and these data evaluate their respective protein levels and localization. The mutations assessed included ATPase mutants (ATP10A<sup>E203Q</sup>, ATP10D<sup>E15Q</sup>), TM1 mutations (ATP10A<sup>NF-QA</sup>, ATP10D<sup>NW-QA</sup>), TM4 mutations (ATP10A<sup>QV-NT</sup>, ATP10D<sup>QV-NT</sup>, ATP10D<sup>QV-NV</sup>, ATP10D<sup>QV-QT</sup>), and TM6 mutations (ATP10A<sup>LI-LT</sup>, ATP10D<sup>LI-IT</sup>, ATP10D<sup>LI-II</sup>, and ATP10D<sup>LI-LT</sup>). TM is numbered in parenthesis. (-) indicates parental HeLa cells. **(A)** The total expression level of the P4-ATPase in each cell was analyzed by immunoblotting with anti-HA and anti-ATP1A1 antibodies (as an internal control). 10 % of the input of the biotinylation reaction was loaded in each lane. The cell surface level of the P4-ATPase in each cell was analyzed after surface biotinylation. Data shown here are representative of at least two independent experiments. **(B-D)** Cells were fixed, permeabilized, and incubated with anti-HA and anti-ATP1A1 antibodies followed by Cy3-conjugated anti-rat and Alexa Fluor 488-conjugated anti-rabbit secondary antibodies. ATP1A1 used as a marker for the plasma membrane.

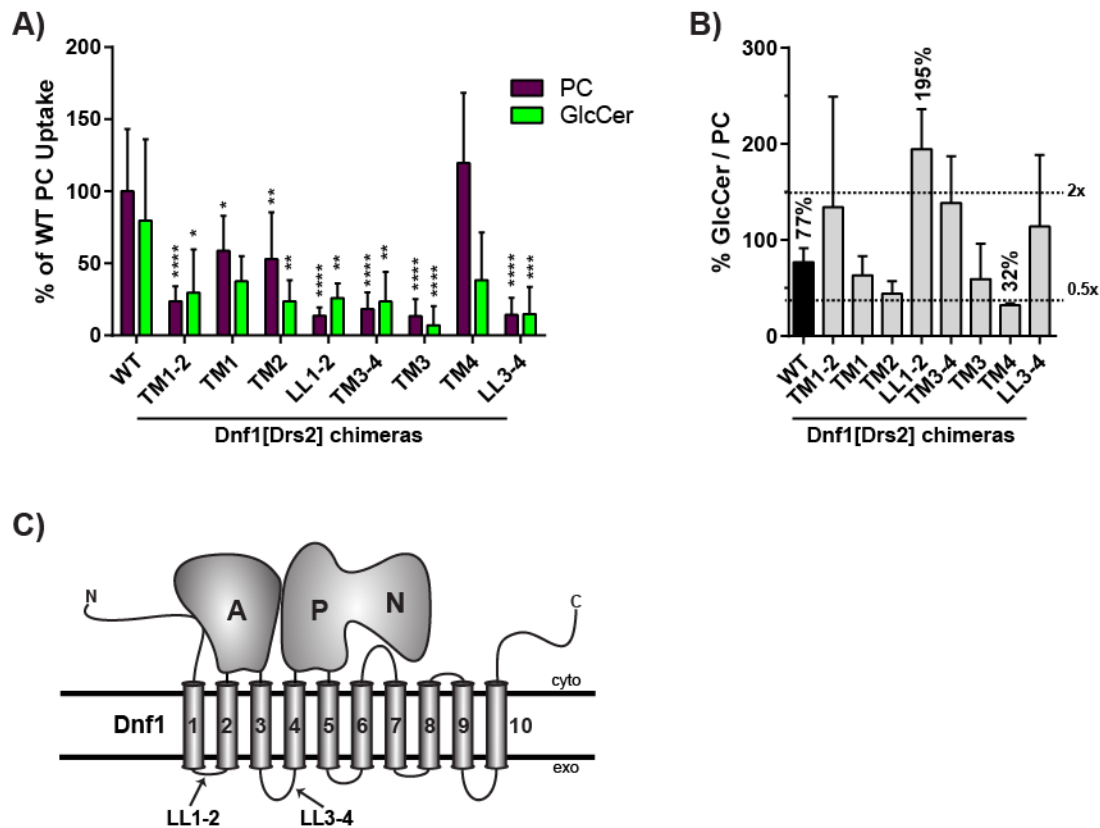

**Figure S6. Dnf1[Drs2] chimeras demonstrate that the luminal regions of Dnf1 TM1-2 and TM4 help select NBD-GlcCer.** TM and loop regions of Dnf1 were replaced with Drs2 coding sequence as previously described (4) and examined for NBD-PC and NBD-GlcCer uptake (A) and preference (B). (A) Many of the chimeras exhibited a general decrease in substrate uptake, yet two chimeras shifted the % GlcCer/PC substrate preference two-fold: Dnf1[LL1-2] and Dnf1[TM4] (B). A cartoon of Dnf1 is presented in (C) to illustrate the regions of the enzyme modified by the chimera approach, with the defining P-Type ATPase cytosolic “A,” “P,” and “N” domains annotated. Variance was assessed among data sets using One-way ANOVAs, and comparisons to WT made with Tukey’s post hoc analysis.  $n \geq 8 \pm$  SD, \* indicates  $p < 0.05$ , \*\* $p < 0.01$ , \*\*\* $p < 0.001$ , \*\*\*\* $p < 0.0001$ .

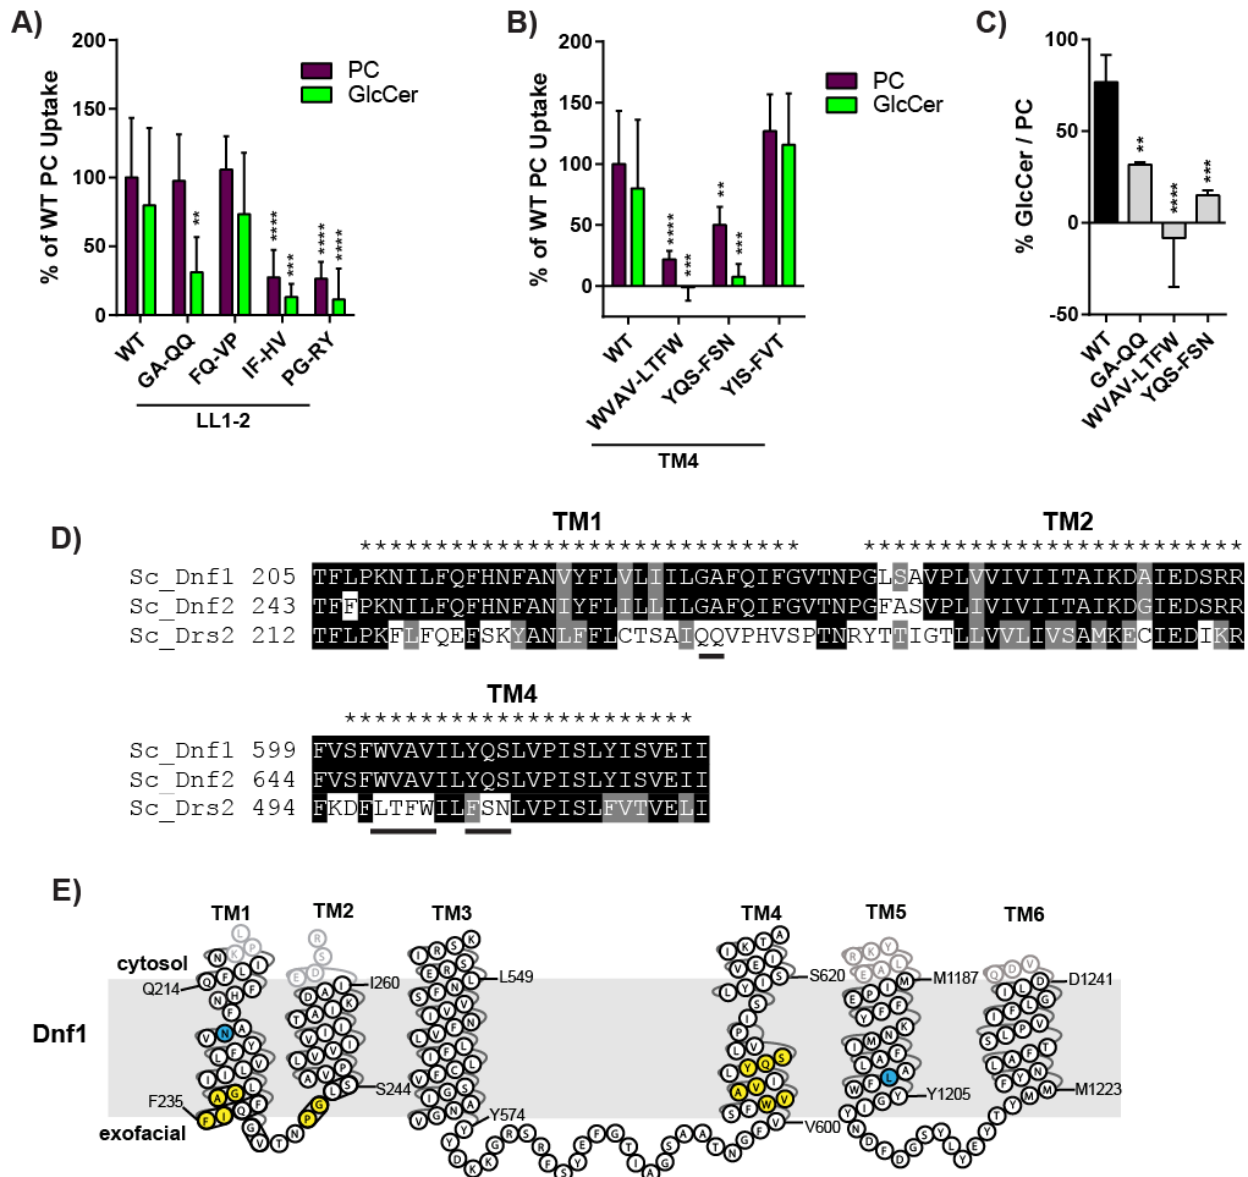

**Figure S7. Dnf1 substitutions establish the involvement of an exofacial GA and YQS motif in GlcCer selection.** Targeted examinations of the Dnf1[LL1-2] (A) and Dnf1[TM4] (B) regions revealed that Dnf1[GA-QQ], Dnf1[WVAV-LTFW] and Dnf1[YQS-FSN] significantly decreased GlcCer preference (C) ( $n \geq 9$ ,  $\pm$  SD). An alignment of TM 1, 2 and 4 from *S. cerevisiae* Dnf1, Dnf2, and Drs2 with TM domains indicated with asterisks and key substrate selective sequences underlined (D). Shown is a topology diagram of Dnf1 TM segments 1-6 with residues that enhance GlcCer transport highlighted in Blue and residues that inhibit GlcCer transport highlighted in Green (B). Variance was assessed among data sets using One-way ANOVAs, and comparisons to WT made with Tukey's post hoc analysis. \* indicates  $p < 0.05$ , \*\* $p < 0.01$ , \*\*\* $p < 0.001$ , \*\*\*\* $p < 0.0001$ .

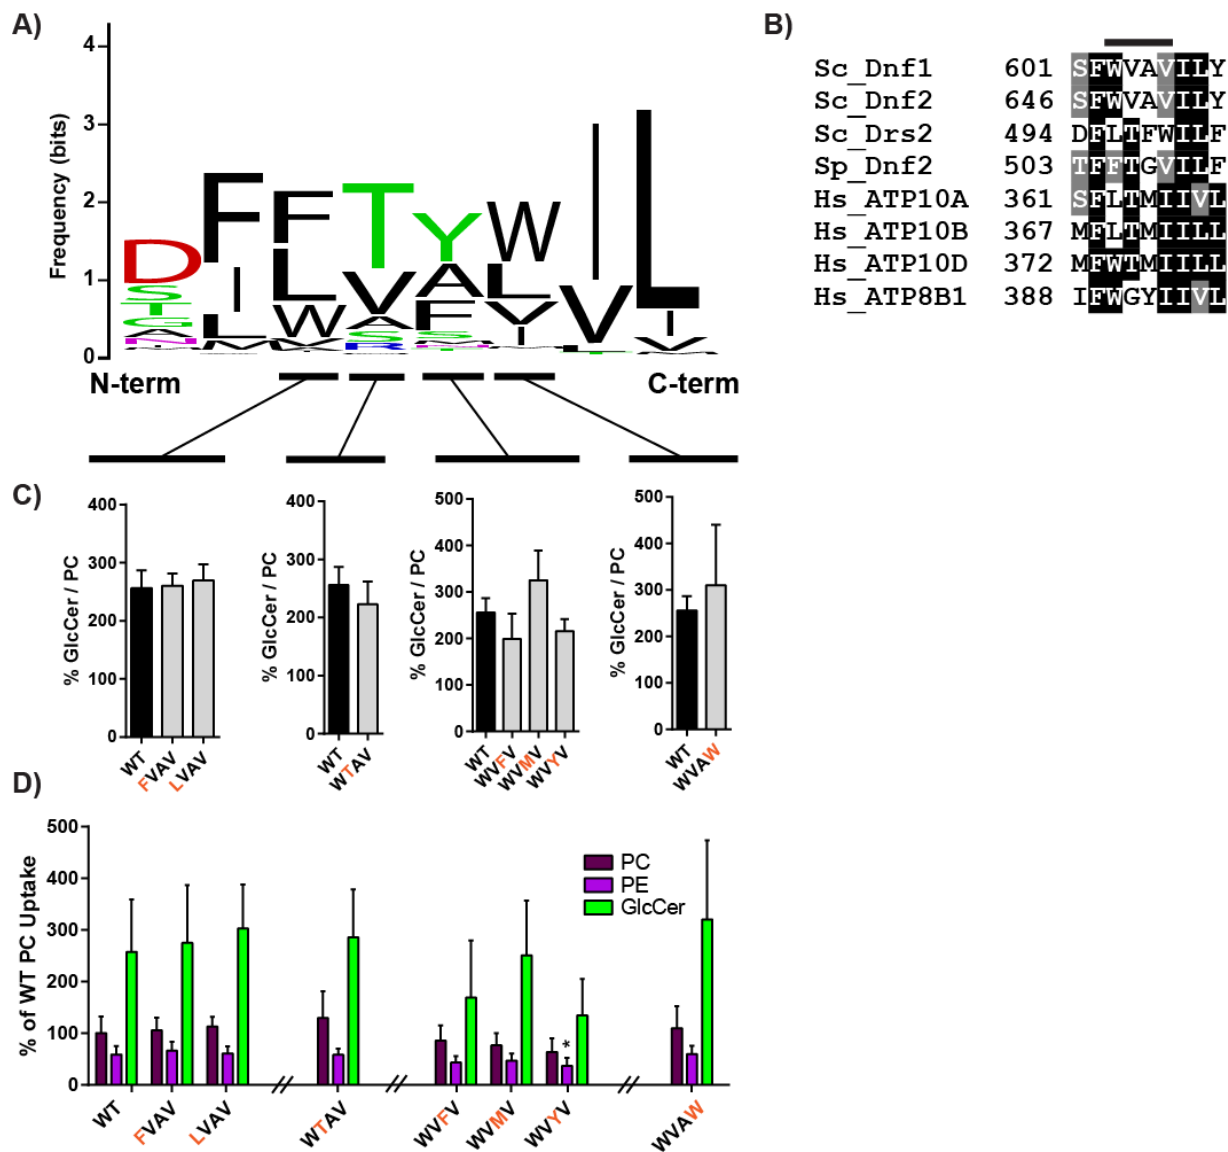

**Figure S8. Single substitutions in the exofacial stretch of Dnf2 TM4 do not influence GlcCer transport.** (A) A sequence logo was created from an alignment of TM4 of P4-ATPases from different organisms, with letter size representing residue frequency and color denoting chemical characteristics. (A) Hydrophilic residues are **green** and **purple**, acidic residues in **red**, and hydrophobic residues are indicated in **black**. (B) A focused alignment comparing a region of TM4 from *S.cerevisiae*, *H.sapiens*, and *S.pombe*, highlighting the **WVAV** motif that was previously altered in *S.c. Dnf1* (fig. S7). Dissecting the four positions of the **WVAV** motif reveals that single substitutions at various positions along this stretch do not significantly alter GlcCer preference (C) or recognition (D). (D) Substitutions in this region do not appear to alter glycerophospholipid recognition either, beyond a third position Ala-to-Tyr substitution at WVAV that reduces PE recognition. Variance was assessed among data sets using One-way ANOVAs, and comparisons to WT made with Tukey's post hoc analysis. Although the WVAV positions in (C) are presented in separate panels, their statistical variance was tested together.  $n \geq 9$ ,  $\pm$  SD, \* indicates  $p < 0.05$ .

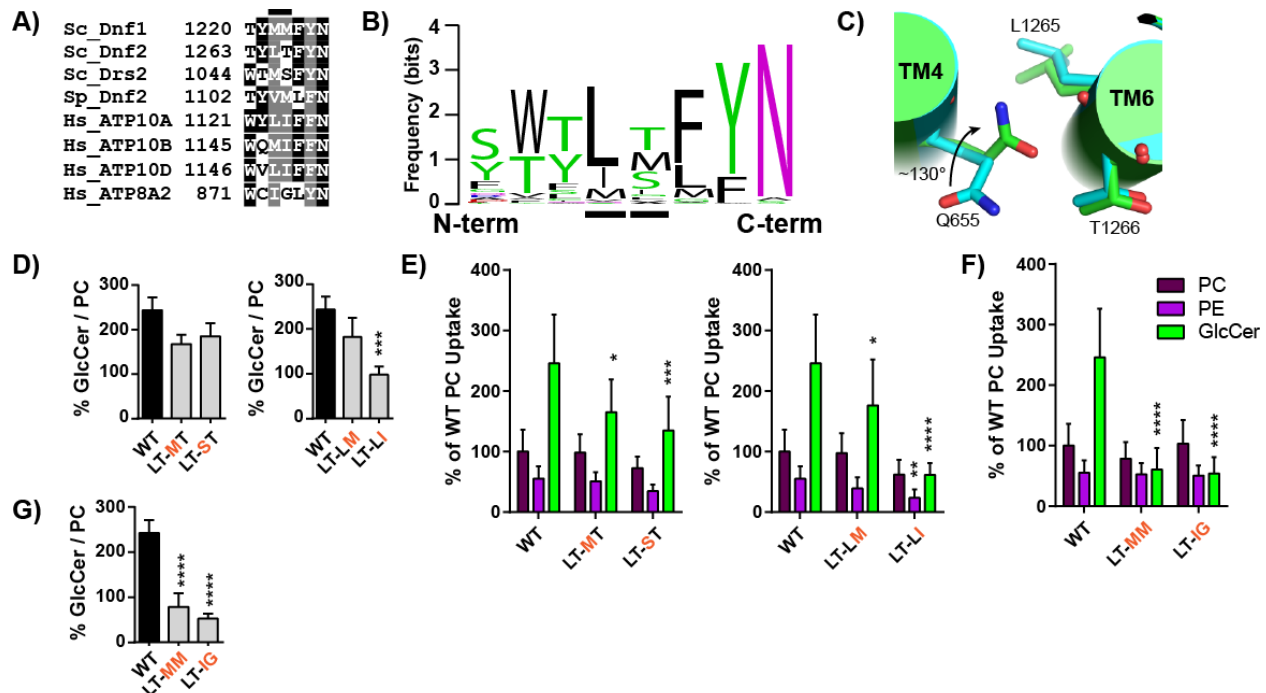

**Figure S9. The TM6 LT motif specifically modulates GlcCer transport.** A focused alignment comparing a region of TM6 from *S.cerevisiae*, *H.sapiens*, and *S.pombe*, highlighting the **LT** motif (A). A sequence logo was created from an alignment of TM6 of P4-ATPases from different organisms, with letter size representing residue frequency and color denoting chemical differences (B). Hydrophilic residues are **green** and **purple**, acidic residues in **red**, and hydrophobic residues are indicated in **black** (B). Homology model of Dnf2 with Q655 indicated in sticks and colored by element (C). The original predicted positioning of Q655 was sculpted as described in the methods, to rotate the residue around the  $\beta$ - $\gamma$  carbon. The original position and associated structures are colored cyan, and the repositioned model shown in green (C). Dissecting the first and second positions of the LT motif reveals that substitutions in the second position can reduce GlcCer preference (D), while both positions alter GlcCer recognition (E). Double-substitutions were created to examine *S.c. Dnf1* and *H. sapiens ATP8A1/2* sequences in the context of the *S. cerevisiae Dnf2*, and it was found that these compound mutations reduced GlcCer selection (F) and preference (G) without altering the known glycerophospholipid substrates (F). Variance was assessed among data sets using One-way ANOVAs, and comparisons to WT made with Tukey's post hoc analysis. Although first and second position LT analyses are presented in different panels (D, E), their statistical variance was tested together. \* indicates  $p < 0.05$ , \*\* $p < 0.01$ , \*\*\* $p < 0.001$ , \*\*\*\* $p < 0.0001$ .

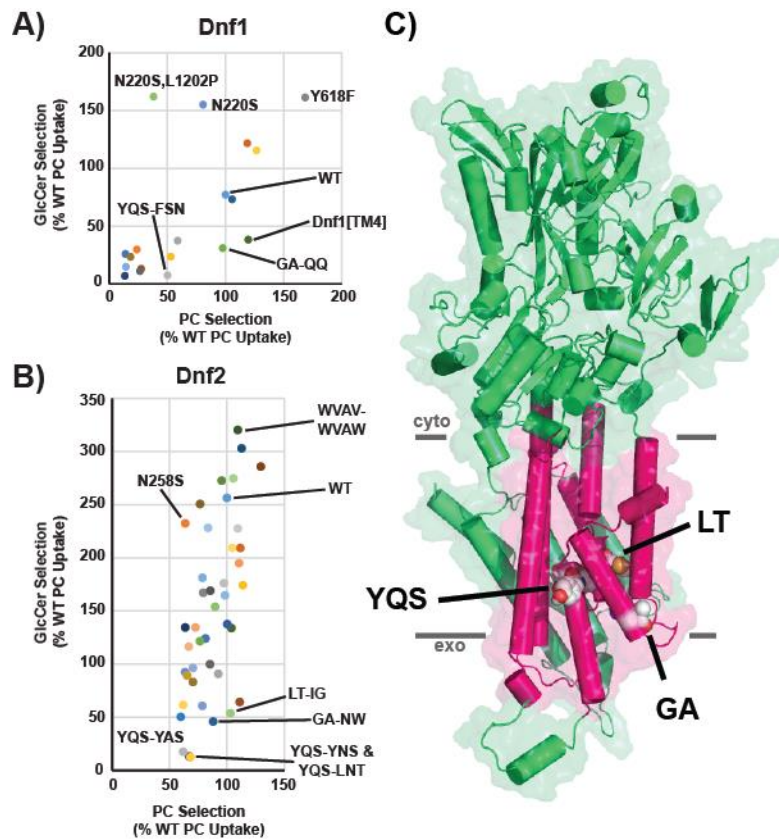

**Figure S10. GlcCer-determining residues on TM1, TM4, and TM6 cluster on Dnf1 homology model.** Scatter plots present the mean PC (x-axis) and GlcCer (y-axis) selection by various chimera and point mutation constructs created from *S.c.* Dnf1 (A) and *S.c.* Dnf2 (B). Enzyme mutants of interest are called out in the scatter plot, and a full table of all mutations are presented in the supplement (Table S3 and S4). (C) Homology model of Dnf1 (from PDB: 3W5D) with TM 1–6 shown as pink cylinders, the rest of the protein colored green, surface shown, and three key primary structural motifs; TM1-GA, TM4-YQS, and TM6-LT; represented in spheres and colored by element; PM boundaries are indicated. Note the predicted 3D clustering of GA, YQS, and LT motifs near the mid-to-exofacial aspect of the TM domain.



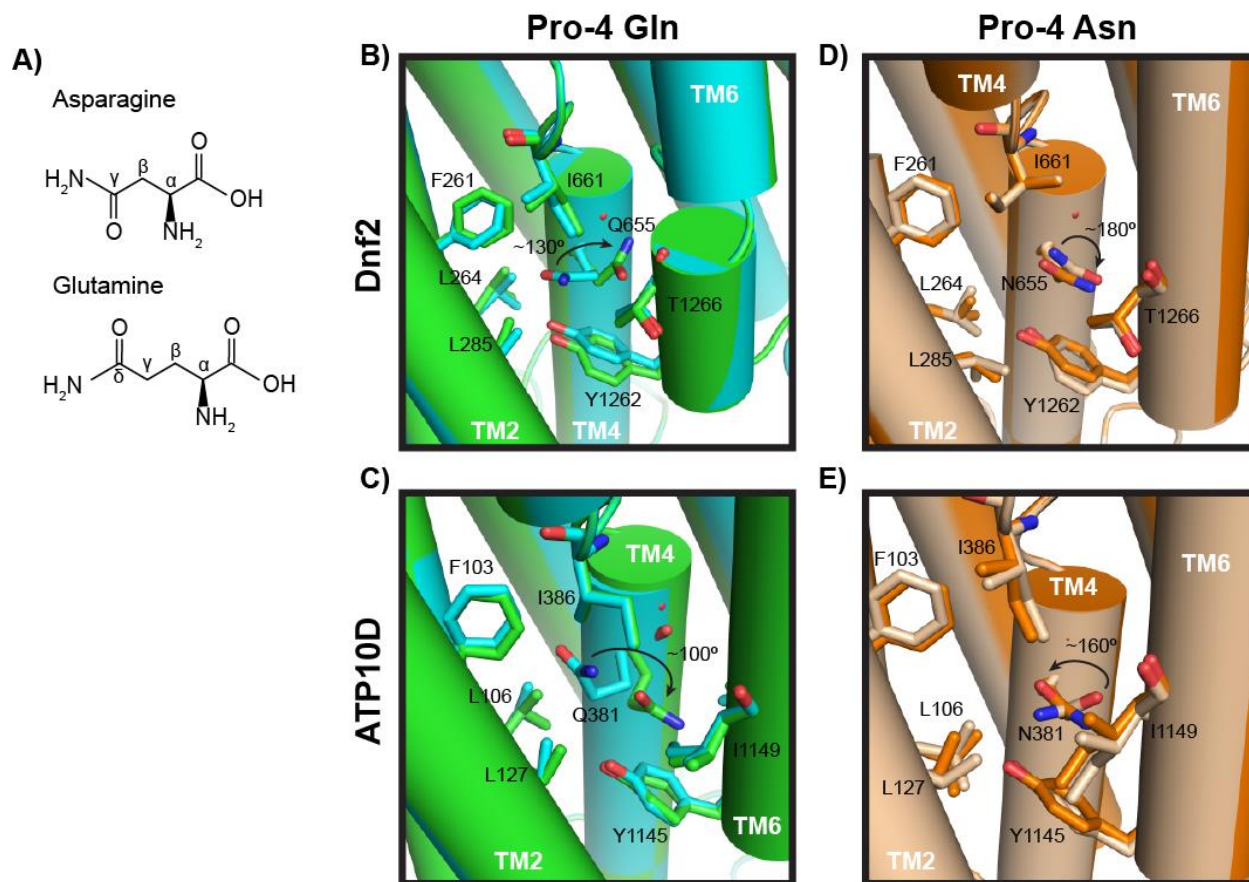

**Figure S11. Pro-4 glutamine is predicted to be rotationally flexible within Dnf2 and ATP10D.** A chemical comparison of the amino acids asparagine and glutamine with labeled carbons for reference (A). Homology models were generated of Dnf2 and ATP10D, and the Pro-4 residue is depicted in (B) and (C), respectively. The Pro-4 glutamine was rotated around the  $\beta$ - $\gamma$  carbon bond as described in the methods, with the original model positions colored cyan and the repositioned model colored green. Important residues impacted by Pro-4 movements are shown in sticks and colored by element. Similarly, homology models of Pro-4 asparagine mutants of Dnf2 and ATP10D were generated, and depicted in (D) and (E), respectively. The Pro-4 asparagine was rotated around the the  $\beta$ - $\gamma$  carbon bond, with the original position colored orange, and the rotated position colored wheat. All model images are oriented with cytofacial aspect of the TM domain up and the exofacial aspect down.

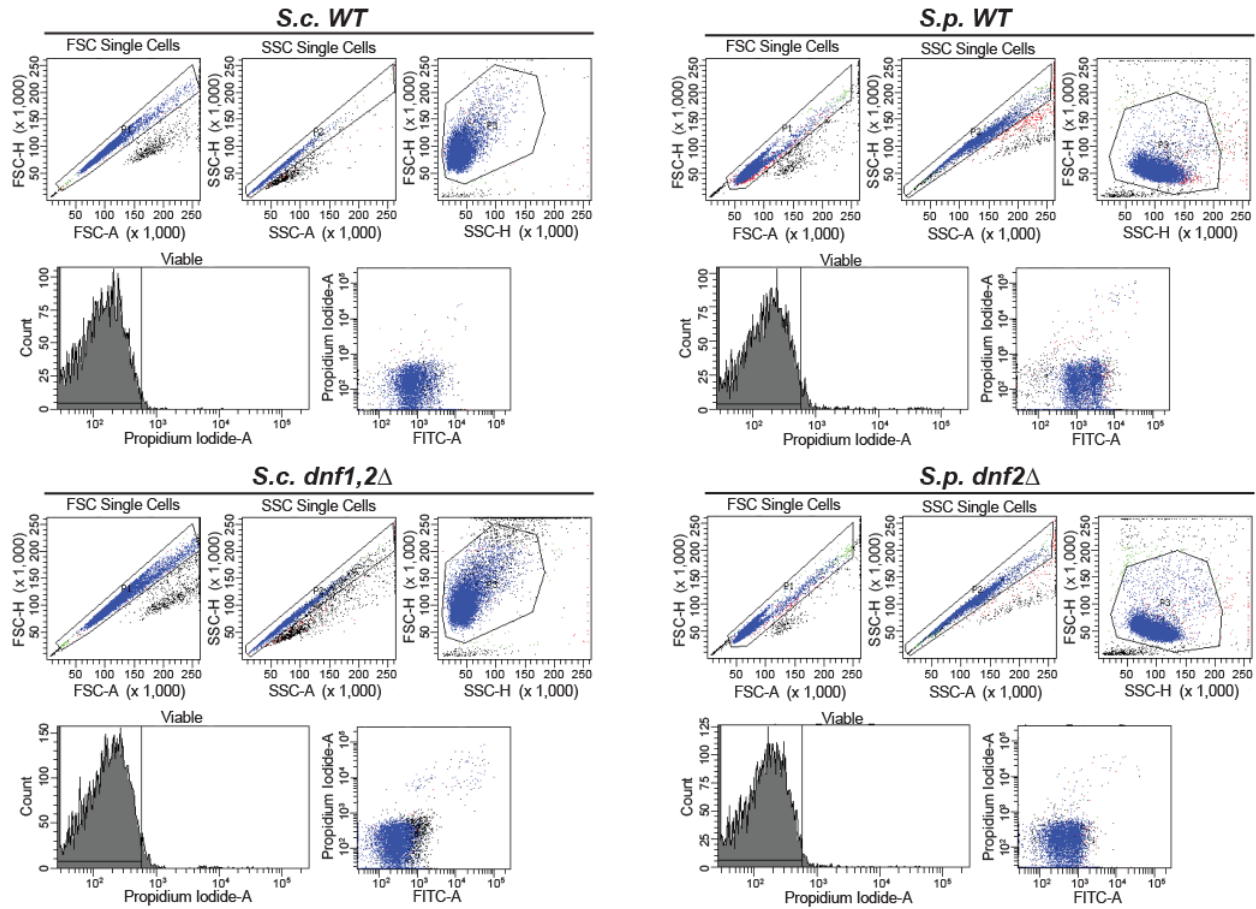

**Figure S12. Gate settings used for comparative *S.cerevisiae* and *S.pombe* flow cytometry analysis.** Flow cytometry gates were set specifically to facilitate intra-experimental comparisons of different fungal species. Presented are the raw data and gate settings from a single experiment performed, comparing NBD-GlcCer uptake in *S.cerevisiae* WT and *dnf1,2Δ*, and *S.pombe* WT and *dnf2Δ*. Three initial forward and side scatter gates were used to isolate single cell populations, PI staining used to select viable cells, and FITC signal was examined. Note the gross shift in FITC signal between the WT and respective P4-ATPase mutants.

**Table S1. Yeast and human cell strains used in this study.**

| Strain               | Genotype                                            | Plasmid                     | Source     |
|----------------------|-----------------------------------------------------|-----------------------------|------------|
| <i>S. cerevisiae</i> |                                                     |                             |            |
| BY4741               | MATa his3Δ1 leu2Δ0<br>ura3Δ0 met15Δ0                | none                        | ATCC       |
| BY4741 YER166W       | MATa his3Δ1 leu2Δ0<br>ura3Δ0 met15Δ0<br>dnf1Δ       | none                        | ATCC       |
| BY4741 YDR093W       | MATa his3Δ1 leu2Δ0<br>ura3Δ0 met15Δ0<br>dnf2Δ       | none                        | ATCC       |
| PFY3275F             | MATa his3Δ1 leu2Δ0<br>ura3Δ0 met15Δ0<br>dnf1Δ dnf2Δ | none                        | (5)        |
| BRY1521 A            | PFY3275F                                            | pRS313                      | This Study |
| BRY1522 A            | PFY3275F                                            | pRS313-Dnf1                 | This Study |
| BRY1523 A            | PFY3275F                                            | pRS313-Dnf2                 | This Study |
| BRY1104.0 G          | PFY3275F                                            | pRS313                      | (6)        |
| BRY1104.1 G          | PFY3275F                                            | pRS313-Dnf1                 | (6)        |
| BRY1104.8 G          | PFY3275F                                            | pRS313-Dnf1 N220S           | (6)        |
| BRY1104.8 D          | PFY3275F                                            | pRS313-Dnf1<br>N220S,L1202P | (6)        |
| RBV640               | PFY3275F                                            | pRS313-Dnf1[TM1-2]          | (4)        |
| RBV6206              | PFY3275F                                            | pRS313-Dnf1[TM1]            | (7)        |
| RBV6209              | PFY3275F                                            | pRS313-Dnf1[TM2]            | (7)        |
| RBV637               | PFY3275F                                            | pRS313-Dnf1[LL1-2]          | (7)        |
| RBV667               | PFY3275F                                            | pRS313-Dnf1[TM3-4]          | (4)        |
| RBV676               | PFY3275F                                            | pRS313-Dnf1[TM3]            | (4)        |
| RBV673               | PFY3275F                                            | pRS313-Dnf1[TM4]            | (4)        |
| RBV679               | PFY3275F                                            | pRS313-Dnf1[LL3-4]          | (4)        |
| RBV607               | PFY3275F                                            | pRS313-Dnf1 GA-QQ           | (7)        |
| RBV610               | PFY3275F                                            | pRS313-Dnf1 FQ-VP           | (7)        |
| RBV616               | PFY3275F                                            | pRS313-Dnf1 IF-HV           | (7)        |
| RBV625               | PFY3275F                                            | pRS313-Dnf1 PG-RY           | (7)        |
| RBV682               | PFY3275F                                            | pRS313-Dnf1 WVAV-<br>LTFW   | (4)        |
| RBV685               | PFY3275F                                            | pRS313-Dnf1 YQS-FSN         | (4)        |
| RBV688               | PFY3275F                                            | pRS313-Dnf1 YIS-FVT         | (4)        |
| BRY2104 A            | PFY3275F                                            | pRS313-Dnf2 GA-QQ           | This Study |
| BRY2108 A            | PFY3275F                                            | pRS313-Dnf2 GA-NA           | This Study |
| BRY2106 A            | PFY3275F                                            | pRS313-Dnf2 GA-QA           | This Study |
| BRY2107 A            | PFY3275F                                            | pRS313-Dnf2 GA-GW           | This Study |
| BRY2105 A            | PFY3275F                                            | pRS313-Dnf2 GA-NW           | This Study |
| BRY2109 A            | PFY3275F                                            | pRS313-Dnf2 GA-QS           | This Study |
| BRY2220 A            | PFY3275F                                            | pRS313-Dnf2 WVAV-<br>FVAV   | This Study |
| BRY2221 A            | PFY3275F                                            | pRS313-Dnf2 WVAV-<br>LVAV   | This Study |

|           |                                                                                                   |                        |            |
|-----------|---------------------------------------------------------------------------------------------------|------------------------|------------|
| BRY2222 A | PFY3275F                                                                                          | pRS313-Dnf2 WVAV-WTAV  | This Study |
| BRY2223 A | PFY3275F                                                                                          | pRS313-Dnf2 WVAV-WVVFV | This Study |
| BRY2224 A | PFY3275F                                                                                          | pRS313-Dnf2 WVAV-WVMV  | This Study |
| BRY2225 A | PFY3275F                                                                                          | pRS313-Dnf2 WVAV-WVYV  | This Study |
| BRY2226 A | PFY3275F                                                                                          | pRS313-Dnf2 WVAV-WVAW  | This Study |
| BRY2127 A | PFY3275F                                                                                          | pRS313-Dnf2 YQS-FQS    | This Study |
| BRY2122 A | PFY3275F                                                                                          | pRS313-Dnf2 YQS-LQS    | This Study |
| BRY2128 A | PFY3275F                                                                                          | pRS313-Dnf2 YQS-YAS    | This Study |
| BRY2123 A | PFY3275F                                                                                          | pRS313-Dnf2 YQS-YNS    | This Study |
| BRY2124 A | PFY3275F                                                                                          | pRS313-Dnf2 YQS-YQN    | This Study |
| BRY2125 A | PFY3275F                                                                                          | pRS313-Dnf2 YQS-YQT    | This Study |
| BRY2126 A | PFY3275F                                                                                          | pRS313-Dnf2 YQS-YQV    | This Study |
| BRY2110 A | PFY3275F                                                                                          | pRS313-Dnf2 YQS-FSN    | This Study |
| BRY2111 A | PFY3275F                                                                                          | pRS313-Dnf2 YQS-LQV    | This Study |
| BRY2112 A | PFY3275F                                                                                          | pRS313-Dnf2 YQS-FQN    | This Study |
| BRY2113 A | PFY3275F                                                                                          | pRS313-Dnf2 YQS-LNT    | This Study |
| BRY2202 A | PFY3275F                                                                                          | pRS313-Dnf2 F261S      | This Study |
| BRY2203 A | PFY3275F                                                                                          | pRS313-Dnf2 L264Q      | This Study |
| BRY2204 A | PFY3275F                                                                                          | pRS313-Dnf2 L264S      | This Study |
| BRY2205 A | PFY3275F                                                                                          | pRS313-Dnf2 L285S      | This Study |
| BRY2206 A | PFY3275F                                                                                          | pRS313-Dnf2 L605S      | This Study |
| BRY2207 A | PFY3275F                                                                                          | pRS313-Dnf2 C609A      | This Study |
| BRY2208 A | PFY3275F                                                                                          | pRS313-Dnf2 S1257Q     | This Study |
| BRY2209 A | PFY3275F                                                                                          | pRS313-Dnf2 Y1262Q     | This Study |
| BRY2210 A | PFY3275F                                                                                          | pRS313-Dnf2 Y1262S     | This Study |
| BRY2234 A | PFY3275F                                                                                          | pRS313-Dnf2 T1266I     | This Study |
| BRY2211 A | PFY3275F                                                                                          | pRS313-Dnf2 L1270S     | This Study |
| BRY2231 A | PFY3275F                                                                                          | pRS313-Dnf2 LT-MT      | This Study |
| BRY2232 A | PFY3275F                                                                                          | pRS313-Dnf2 LT-ST      | This Study |
| BRY2233 A | PFY3275F                                                                                          | pRS313-Dnf2 LT-LM      | This Study |
| BRY2235 A | PFY3275F                                                                                          | pRS313-Dnf2 LT-MM      | This Study |
| BRY2236 A | PFY3275F                                                                                          | pRS313-Dnf2 LT-IG      | This Study |
| BRY2103 A | PFY3275F                                                                                          | pRS313-Dnf2 N220S      | This Study |
| BRY3001 A | BY4741                                                                                            | pSM1959-Sec63-RFP      | This Study |
| BRY3002 A | PFY3275F                                                                                          | pSM1959-Sec63-RFP      | This Study |
| BRY3003 A | BY4741                                                                                            | pRS313-Tlg1-mCherry    | This Study |
| BRY3004 A | PFY3275F                                                                                          | pRS313-Tlg1-mCherry    | This Study |
| BRY3005 A | BY4741                                                                                            | pRS305-mt-RFP          | This Study |
| BRY3006 A | PFY3275F                                                                                          | pRS305-mt-RFP          | This Study |
| SCY119    | MAT $\alpha$ his3 $\Delta$ 1 leu2 $\Delta$ 0<br>ura3 $\Delta$ 0 met15 $\Delta$ 0<br>lem3 $\Delta$ | None                   | (4)        |
| RBV9701   | PFY3275F lem3 $\Delta$                                                                            | None                   | (4)        |
|           |                                                                                                   |                        |            |

|                            |                                                                                      |                                |            |
|----------------------------|--------------------------------------------------------------------------------------|--------------------------------|------------|
| <i>S.pombe</i>             |                                                                                      |                                |            |
| KGY246                     | ade6-m210 leu1-32<br>ura4-D18 h-                                                     | none                           | Gould Lab  |
| <i>S.p. dnf2Δ</i>          | SPAC<br>24B11.12C:: <i>kanMX4</i><br><i>h+ ade6-M210 ura4-</i><br><i>D18 leu1-32</i> | none                           | Gould Lab  |
|                            |                                                                                      |                                |            |
| <i>H.sapiens</i>           |                                                                                      |                                |            |
| HeLa                       |                                                                                      |                                |            |
| HeLa/ATP8A1-HA             |                                                                                      | pMx/neo-hATP8A1-HA             | This Study |
| HeLa/ATP8B1-HA             |                                                                                      | pMx/neo-hATP8B1-HA             | (2)        |
| HeLa/ATP8B2-HA             |                                                                                      | pMx/neo-hATP8B2-HA             | (2)        |
| HeLa/ATP8B4-HA             |                                                                                      | pMx/neo-hATP8B4-HA             | This Study |
| HeLa/ATP10A-HA             |                                                                                      | pMx/neo-hATP10A-HA             | (8)        |
| HeLa/ATP10D-HA             |                                                                                      | pMx/neo-hATP10D-HA             | (8)        |
| HeLa/ATP11A-HA             |                                                                                      | pMx/neo-hATP11A-HA             | (2)        |
| HeLa/ATP11C-HA             |                                                                                      | pMx/neo-hATP11C-HA             | (2)        |
| HeLa/ATP10A(E203Q)-<br>HA  |                                                                                      | pMx/neo-hATP10A(E203Q)-<br>HA  | (8)        |
| HeLa/ATP10D(E215Q)-<br>HA  |                                                                                      | pMx/neo-hATP10D(E215Q)-<br>HA  | This Study |
| HeLa/ATP10D(NW-<br>QA)-HA  |                                                                                      | pMx/neo-hATP10D(NW-<br>QA)-HA  | This Study |
| HeLa/ATP10D(QV-<br>NT)-HA  |                                                                                      | pMx/neo-hATP10D(QV-<br>NT)-HA  | This Study |
| HeLa/ATP10D(Q381N)-<br>HA  |                                                                                      | pMx/neo-<br>hATP10D(Q381N)-HA  | This Study |
| HeLa/ATP10D(V382T)-<br>HA  |                                                                                      | pMx/neo-hATP10D(V382T)-<br>HA  | This Study |
| HeLa/ATP10D(LI-IT)-<br>HA  |                                                                                      | pMx/neo-hATP10D(LI-IT)-<br>HA  | This Study |
| HeLa/ATP10D(L1148I)-<br>HA |                                                                                      | pMx/neo-<br>hATP10D(L1148I)-HA | This Study |
| HeLa/ATP10D(I1149T)-<br>HA |                                                                                      | pMx/neo-<br>hATP10D(I1149T)-HA | This Study |
| HeLa/ATP10A(NF-<br>QA)-HA  |                                                                                      | pMx/neo-hATP10A(NF-<br>QA)-HA  | This Study |
| HeLa/ATP10A(QV-<br>NT)-HA  |                                                                                      | pMx/neo-hATP10A(QV-<br>NT)-HA  | This Study |
| HeLa/ATP10A(LI-IT)-<br>HA  |                                                                                      | pMx/neo-hATP10A(LI-IT)-<br>HA  | This Study |

**Table S2. Plasmids used in this study.**

| Plasmid     | Notes | Source |
|-------------|-------|--------|
| pRS313      |       | (9)    |
| pRS313-Dnf1 |       | (10)   |

|                          |                            |            |
|--------------------------|----------------------------|------------|
| pRS313-Dnf1 N220S        |                            | (6)        |
| pRS313-Dnf1 N220S,L1202P |                            | (6)        |
| pRS313-Dnf1[TM1-2]       | Chimera enzyme with [Drs2] | (4)        |
| pRS313-Dnf1[TM1]         | Chimera enzyme with [Drs2] | (7)        |
| pRS313-Dnf1[TM2]         | Chimera enzyme with [Drs2] | (7)        |
| pRS313-Dnf1[LL1-2]       | Chimera enzyme with [Drs2] | (7)        |
| pRS313-Dnf1[TM3-4]       | Chimera enzyme with [Drs2] | (4)        |
| pRS313-Dnf1[TM3]         | Chimera enzyme with [Drs2] | (7)        |
| pRS313-Dnf1[TM4]         | Chimera enzyme with [Drs2] | (7)        |
| pRS313-Dnf1[LL3-4]       | Chimera enzyme with [Drs2] | (4)        |
| pRS313-Dnf1 GA-QQ        | G230Q,A231Q                | (7)        |
| pRS313-Dnf1 FQ-VP        | F232V,Q233P                | (7)        |
| pRS313-Dnf1 IF-HV        | I234H,F235V                | (7)        |
| pRS313-Dnf1 PG-RY        | P240R,G241Y                | (7)        |
| pRS313-Dnf1 WVAV-LTFW    | W603L,V604T,A605F,V606W    | (4)        |
| pRS313-Dnf1 YQS-FSN      | Y609F,Q610S,S611N          | (4)        |
| pRS313-Dnf1 YIS-FVT      | Y618F,I619V,S620T          | (4)        |
| pRS313-Dnf2 GA-QQ        | G268Q,A269Q                | This study |
| pRS313-Dnf2 GA-NA        | G268N                      | This study |
| pRS313-Dnf2 GA-QA        | G268Q                      | This study |
| pRS313-Dnf2 GA-GW        | A269W                      | This study |
| pRS313-Dnf2 GA-NW        | G268N,A269W                | This study |
| pRS313-Dnf2 GA-QS        | G268Q,A269S                | This study |
| pRS313-Dnf2 WVAV-FVAV    | W648F                      | This study |
| pRS313-Dnf2 WVAV-LVAV    | W648L                      | This study |
| pRS313-Dnf2 WVAV-WTAV    | V649T                      | This study |
| pRS313-Dnf2 WVAV-WVAV    | A650F                      | This study |
| pRS313-Dnf2 WVAV-WVMV    | A650M                      | This study |
| pRS313-Dnf2 WVAV-WVYV    | A650Y                      | This study |
| pRS313-Dnf2 WVAV-WVAW    | V651W                      | This study |
| pRS313-Dnf2 YQS-FQS      | Y654F                      | This study |
| pRS313-Dnf2 YQS-LQS      | Y654L                      | This study |
| pRS313-Dnf2 YQS-YAS      | Q655A                      | This study |
| pRS313-Dnf2 YQS-YNS      | Q655N                      | This study |
| pRS313-Dnf2 YQS-YQN      | S656N                      | This study |
| pRS313-Dnf2 YQS-YQT      | S656T                      | This study |
| pRS313-Dnf2 YQS-YQV      | S656V                      | This study |
| pRS313-Dnf2 YQS-FSN      | Y654F,Q655S,S656N          | This study |
| pRS313-Dnf2 YQS-LQV      | Y654L,S656V                | This study |
| pRS313-Dnf2 YQS-FQN      | Y654F,S656N                | This study |
| pRS313-Dnf2 YQS-LNT      | Y654L,Q655N,S654T          | This study |
| pRS313-Dnf2 F261S        |                            | This study |
| pRS313-Dnf2 L264Q        |                            | This study |
| pRS313-Dnf2 L264S        |                            | This study |
| pRS313-Dnf2 L285S        |                            | This study |
| pRS313-Dnf2 L605S        |                            | This study |
| pRS313-Dnf2 C609A        |                            | This study |
| pRS313-Dnf2 S1257Q       |                            | This study |
| pRS313-Dnf2 Y1262Q       |                            | This study |

|                            |                           |            |
|----------------------------|---------------------------|------------|
| pRS313-Dnf2 Y1262S         |                           | This study |
| pRS313-Dnf2 T1266I         | i.e. LT-LI mutant         | This study |
| pRS313-Dnf2 L1270S         |                           | This study |
| pRS313-Dnf2 LT-MT          | L1265M                    | This study |
| pRS313-Dnf2 LT-ST          | L1265S                    | This study |
| pRS313-Dnf2 LT-LM          | T1266M                    | This study |
| pRS313-Dnf2 LT-MM          | L1265M, T1266M            | This study |
| pRS313-Dnf2 LT-IG          | L1265I, T1266G            | This study |
| pRS313-Dnf2 N258S          | Homologous to Dnf1[N220S] | This study |
| pSM1959-Sec63-RFP          | Red ER marker             | (11)       |
| pRS313-Tlg1-mCherry        | Red trans-golgi marker    | (12)       |
| pRS305-mt-RFP              | Red mitochondrial marker  | (13)       |
| pMx/neo-hATP8A1-HA         |                           | (2)        |
| pMx/neo-hATP8B1-HA         |                           | (2)        |
| pMx/neo-hATP8B2-HA         |                           | (2)        |
| pMx/neo-hATP8B4-HA         |                           | This Study |
| pMx/neo-hATP9A-HA          |                           | This Study |
| pMx/neo-hATP9B-HA          |                           | This Study |
| pMx/neo-hATP10A-HA         |                           | (8)        |
| pMx/neo-hATP10B-HA         |                           | This Study |
| pMx/neo-hATP10D-HA         |                           | (8)        |
| pMx/neo-hATP11A-HA         |                           | (2)        |
| pMx/neo-hATP11B-HA         |                           | This Study |
| pMx/neo-hATP11C-HA         |                           | (2)        |
| pMx/neo-hATP10A(E203Q)-HA  | E203Q                     | (8)        |
| pMx/neo-hATP10D(E215Q)-HA  | E215Q                     | This Study |
| pMx/neo-hATP10D(NW-QA)-HA  | N110Q, W111A              | This Study |
| pMx/neo-hATP10D(QV-NT)-HA  | Q381N, V382T              | This Study |
| pMx/neo-hATP10D(Q381N)-HA  | Q381N, i.e. QV-NV mutant  | This Study |
| pMx/neo-hATP10D(V382T)-HA  | V382T, i.e. QV-QT mutant  | This Study |
| pMx/neo-hATP10D(LI-IT)-HA  | L1148I, I1149T            | This Study |
| pMx/neo-hATP10D(L1148I)-HA | L1148I, i.e. LI-II mutant | This Study |
| pMx/neo-hATP10D(I1149T)-HA | I1149T, i.e. LI-LT mutant | This Study |
| pMx/neo-hATP10A(NF-QA)-HA  | N98Q, F99A                | This Study |
| pMx/neo-hATP10A(QV-NT)-HA  | Q370N, V371T              | This Study |
| pMx/neo-hATP10A(LI-IT)-HA  | L1123I, I1124T            | This Study |

**Table S3. Concatenated mean PC and GlcCer selection for all Dnf1 mutants.**



| <b>Dnf1 Variant</b> | <b>PC Selection (% WT PC)</b> | <b>GlcCer Selection (% WT PC)</b> |
|---------------------|-------------------------------|-----------------------------------|
| Dnf1 WT             | 100                           | 77.24                             |
| Dnf1[TM1-2]         | 23.67                         | 29.83                             |
| Dnf1[TM1]           | 58.79                         | 37.55                             |
| Dnf1[TM2]           | 52.86                         | 23.67                             |
| Dnf1[LL1-2]         | 13.83                         | 25.99                             |
| Dnf1[GA-QQ]         | 97.53                         | 31.01                             |
| Dnf1[FQ-VP]         | 105.7                         | 73.28                             |
| Dnf1[IF-HV]         | 27.36                         | 13.11                             |
| Dnf1[PG-RY]         | 26.36                         | 11.29                             |
| Dnf1[TM3-4]         | 18.22                         | 23.55                             |
| Dnf1[TM3]           | 13.39                         | 7.055                             |
| Dnf1[TM4]           | 119.6                         | 38.39                             |
| Dnf1[LL3-4]         | 14.29                         | 14.8                              |
| Dnf1[WVAV-LTFW]     | 21.93                         | -0.8532                           |
| Dnf1[YQS-FSN]       | 50.04                         | 7.551                             |
| Dnf1[YIS-FVT]       | 126.7                         | 115.6                             |
| Dnf1 N220S          | 80.67                         | 155.2                             |
| Dnf1 N220S,L1202P   | 38                            | 162.1                             |
| Dnf1[GA-QQ]         | 118.4                         | 34                                |
| Dnf1 N550S          | 118.8                         | 121.8                             |
| Dnf1 Y618F          | 168.5                         | 161.4                             |

**Table S4. Concatenated mean PC and GlcCer selection for all Dnf2 mutants.**

| <b>Dnf2 Variant</b> | <b>PC Selection (% WT PC)</b> | <b>GlcCer Selection (% WT PC)</b> |
|---------------------|-------------------------------|-----------------------------------|
| Dnf2 WT             | 100                           | 256.3                             |
| Dnf2 N220S          | 63.62                         | 232.3                             |
| Dnf2 GA-QA          | 92.51                         | 90.68                             |
| Dnf2 GA-GW          | 113.9                         | 174.1                             |
| Dnf2 GA-NA          | 81.27                         | 124                               |
| Dnf2 GA-QQ          | 76.5                          | 121.5                             |
| Dnf2 GA-NW          | 88.04                         | 45.88                             |
| Dnf2 YQS-FSN        | 111.1                         | 64.24                             |
| Dnf2 YQS-LQV        | 85.28                         | 99.8                              |
| Dnf2 YQS-FQN        | 70.28                         | 83.11                             |
| Dnf2 YQS-LNT        | 67.32                         | 12.91                             |
| Dnf2 GA-QS          | 103.9                         | 133.8                             |
| Dnf2 YQS-FQS        | 78.62                         | 181.2                             |
| Dnf2 YQS-LQS        | 110.5                         | 194.8                             |
| Dnf2 YQS-YAS        | 61.8                          | 17.44                             |
| Dnf2 YQS-YNS        | 68.21                         | 12.33                             |
| Dnf2 YQS-YQN        | 63.57                         | 92.39                             |
| Dnf2 YQS-YQT        | 89.8                          | 153.8                             |
| Dnf2 YQS-YQV        | 59.83                         | 50.32                             |
| Dnf2 F261S          | 111.6                         | 209.2                             |

|                |       |       |
|----------------|-------|-------|
| Dnf2 L264Q     | 79.42 | 167.1 |
| Dnf2 L264S     | 65.35 | 89.12 |
| Dnf2 L285S     | 100.2 | 137.6 |
| Dnf2 C609A     | 95.4  | 272.6 |
| Dnf2 L605S     | 83.54 | 228.1 |
| Dnf2 S1257Q    | 66.74 | 116.3 |
| Dnf2 Y1262Q    | 109.4 | 227.5 |
| Dnf2 Y1262S    | 104.6 | 209.3 |
| Dnf2 L1270S    | 70.3  | 96.32 |
| Dnf2 WVAV-FVAV | 105.6 | 274.7 |
| Dnf2 WVAV-LVAV | 112.8 | 302.9 |
| Dnf2 WVAV-WTAV | 129.5 | 285.8 |
| Dnf2 WVAV-WVAV | 85.52 | 169   |
| Dnf2 WVAV-WVMV | 76.59 | 250.5 |
| Dnf2 WVAV-WVYV | 63.64 | 134.4 |
| Dnf2 WVAV-WVAW | 109.5 | 320.2 |
| Dnf2 LT-MT     | 98.33 | 164.7 |
| Dnf2 LT-ST     | 72.63 | 134.4 |
| Dnf2 LT-LM     | 97.35 | 176   |
| Dnf2 LT-LI     | 61.85 | 61.59 |
| Dnf2 LT-MM     | 78.55 | 60.61 |
| Dnf2 LT-IG     | 103   | 53.68 |

## Supplemental References

1. Cromey DW (2010) Avoiding twisted pixels: ethical guidelines for the appropriate use and manipulation of scientific digital images. *Sci Eng Ethics* 16(4):639-667.
2. Takatsu H, *et al.* (2014) Phospholipid flippase activities and substrate specificities of human type IV P-type ATPases localized to the plasma membrane. *J Biol Chem* 289(48):33543-33556.
3. Crooks GE, Hon G, Chandonia JM, & Brenner SE (2004) WebLogo: a sequence logo generator. *Genome Res* 14(6):1188-1190.
4. Baldrige RD & Graham TR (2012) Identification of residues defining phospholipid flippase substrate specificity of type IV P-type ATPases. *Proc Natl Acad Sci U S A* 109(6):E290-298.
5. Hua Z & Graham TR (2003) Requirement for neo1p in retrograde transport from the Golgi complex to the endoplasmic reticulum. *Mol Biol Cell* 14(12):4971-4983.
6. Roland BP & Graham TR (2016) Directed evolution of a sphingomyelin flippase reveals mechanism of substrate backbone discrimination by a P4-ATPase. *Proc Natl Acad Sci U S A* 113(31):E4460-4466.
7. Baldrige RD & Graham TR (2013) Two-gate mechanism for phospholipid selection and transport by type IV P-type ATPases. *Proc Natl Acad Sci U S A* 110(5):E358-367.
8. Naito T, *et al.* (2015) Phospholipid Flippase ATP10A Translocates Phosphatidylcholine and Is Involved in Plasma Membrane Dynamics. *J Biol Chem* 290(24):15004-15017.
9. Sikorski RS & Hieter P (1989) A system of shuttle vectors and yeast host strains designed for efficient manipulation of DNA in *Saccharomyces cerevisiae*. *Genetics* 122(1):19-27.
10. Liu K, Hua Z, Nepute JA, & Graham TR (2007) Yeast P4-ATPases Drs2p and Dnf1p are essential cargos of the NPFxD/Slp1p endocytic pathway. *Mol Biol Cell* 18(2):487-500.

11. Metzger MB, Maurer MJ, Dancy BM, & Michaelis S (2008) Degradation of a cytosolic protein requires endoplasmic reticulum-associated degradation machinery. *J Biol Chem* 283(47):32302-32316.
12. Xu P, Baldrige RD, Chi RJ, Burd CG, & Graham TR (2013) Phosphatidylserine flipping enhances membrane curvature and negative charge required for vesicular transport. *J Cell Biol* 202(6):875-886.
13. Bhar D, Karren MA, Babst M, & Shaw JM (2006) Dimeric Dnm1-G385D interacts with Mdv1 on mitochondria and can be stimulated to assemble into fission complexes containing Mdv1 and Fis1. *J Biol Chem* 281(25):17312-17320.
